# Supplementary material for: Impact of Rural vs. Urban Residence on Survival Rates of Patients with Glioblastoma: A Tertiary Care Center Experience
Source: MDPI journal article supplement (doi:10.3390/brainsci12091186), 2022-09-02
Supplement: s1 [file s1]

**Table S1.** Distribution of study sample characteristics by death rate.

| Bio-demographic data                                  | Death |       |     |       | p-value |
|-------------------------------------------------------|-------|-------|-----|-------|---------|
|                                                       | No    |       | Yes |       |         |
|                                                       | No    | %     | No  | %     |         |
| Age in years                                          |       |       |     |       |         |
| < 30                                                  | 10    | 55.6% | 8   | 44.4% | 0.001*  |
| 30-49                                                 | 14    | 35.9% | 25  | 64.1% |         |
| 50+                                                   | 9     | 13.2% | 59  | 86.8% |         |
| Gender                                                |       |       |     |       |         |
| Male                                                  | 30    | 32.3% | 63  | 67.7% | 0.059   |
| Female                                                | 3     | 9.4%  | 29  | 90.6% |         |
| Elderly                                               |       |       |     |       |         |
| Yes                                                   | 2     | 8.3%  | 22  | 91.7% | 0.001*  |
| No                                                    | 31    | 30.7% | 70  | 69.3% |         |
| Eastern Cooperative Oncology Group Performance Status |       |       |     |       |         |
| < 2                                                   | 26    | 39.4% | 40  | 60.6% | 0.001*  |
| > 2                                                   | 4     | 9.5%  | 38  | 90.5% |         |
| DM                                                    |       |       |     |       |         |
| Yes                                                   | 10    | 25.0% | 30  | 75.0% | 0.059   |
| No                                                    | 23    | 27.1% | 62  | 72.9% |         |
| HTN                                                   |       |       |     |       |         |
| Yes                                                   | 7     | 20.6% | 27  | 79.4% | 0.127   |
| No                                                    | 26    | 28.6% | 65  | 71.4% |         |
| Seizures                                              |       |       |     |       |         |
| Yes                                                   | 10    | 29.4% | 24  | 70.6% | 0.402   |
| No                                                    | 23    | 26.1% | 65  | 73.9% |         |

*P*: Log rank test

\*  $P < 0.05$  (significant)

**Table S2.** Cox-regression model for predictors of death among the study sample

| Factors                                     | p-value | HR   | 95% CI |       |
|---------------------------------------------|---------|------|--------|-------|
|                                             |         |      | Lower  | Upper |
| Age in years                                | 0.004*  | 2.35 | 1.31   | 4.23  |
| ECOG (>2)                                   | 0.017*  | 3.61 | 1.26   | 10.34 |
| Resection surgery                           | 0.045*  | 6.12 | 1.04   | 36.08 |
| Residual                                    | 0.007*  | 0.18 | 0.05   | 0.62  |
| Hypofractionated radiotherapy               | 0.011*  | 6.93 | 1.57   | 30.63 |
| Early adjuvant chemotherapy discontinuation | 0.050*  | 2.28 | 1.01   | 5.21  |

*HR: Hazard ratio*

*CIL Confidence interval*

*\*  $P < 0.05$  (significant)*

**Table S3.** MGMT status in total and by patient's residence

| MGMT         | Total |       | Residence   |       |                |       | P value |
|--------------|-------|-------|-------------|-------|----------------|-------|---------|
|              |       |       | From Riyadh |       | Outside Riyadh |       |         |
|              | No    | %     | No          | %     | No             | %     |         |
| Unknown      | 107   | 85.6% | 52          | 85.2% | 55             | 85.9% | 0.260   |
| Methylated   | 8     | 6.4%  | 2           | 3.3%  | 6              | 9.4%  |         |
| Unmethylated | 9     | 7.2%  | 6           | 9.8%  | 3              | 4.7%  |         |
| Trace        | 1     | 0.8%  | 1           | 1.6%  | 0              | 0.0%  |         |

P: Exact probability test
